# Supplementary material for: The Diagnostic and Prognostic Utility of Contemporary Cardiac Magnetic Resonance in Suspected Acute Myocarditis
Source: MDPI journal article supplement (doi:10.3390/diagnostics12010156), 2022-01-10
Supplement: s1 [file s1]

# The diagnostic and prognostic utility of contemporary CMR in suspected acute myocarditis

## Supplementary material

Supplementary Table S1. Relationship between clinical presentation and cardiovascular magnetic resonance measurements.

| Symptoms                   | LVEF (%) |         | LGE (g) |         | ECV (%)*          |         |
|----------------------------|----------|---------|---------|---------|-------------------|---------|
|                            | r        | p value | r       | p value | r                 | p value |
| Chest pain                 | 0.43     | <0.001  | -0.17   | 0.033   | -0.28             | <0.001  |
| HF symptoms                | -0.19    | 0.015   | 0.21    | 0.008   | 0.22              | 0.005   |
| Pre-/Syncope               | -0.16    | 0.050   | 0.26    | 0.001   | 0.15              | 0.068   |
| Palpitations or arrhythmia | -0.29    | <0.001  | 0.03    | 0.678   | 0.09              | 0.264   |
| Troponin <sup>†</sup>      | 0.09     | 0.257   | 0.18    | 0.023   | 0.09 <sup>Δ</sup> | 0.280   |

<sup>†</sup> n=152; \* n=155; <sup>Δ</sup> n=149. ECV-extracellular volume; HF-heart failure; LGE-Late enhancement imaging; LVEF-Left ventricular ejection fraction.
